# Supplementary material
Source: Springer Nature journal article supplement (https://www.springermedizin.de/resource/supplementary/12935_2009_235_MOESM2_ESM.pdf/9540190)

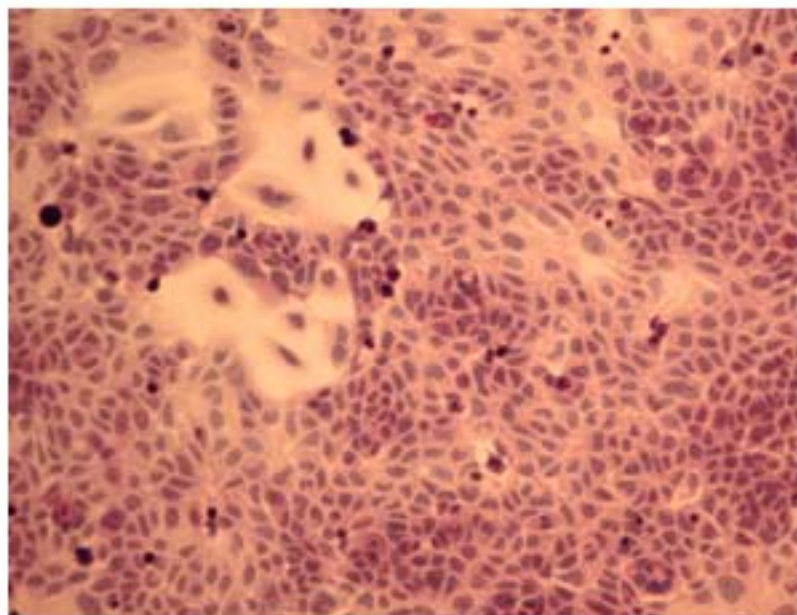

**a) HUC**

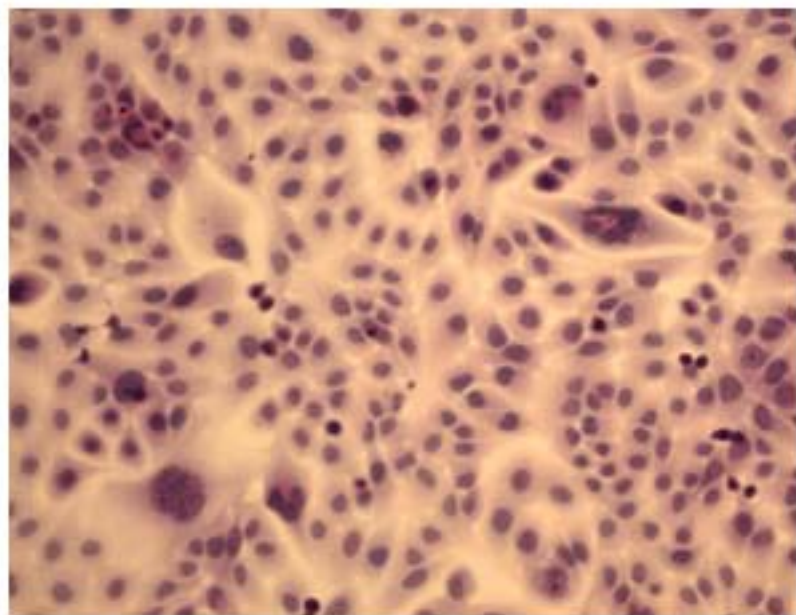

**b) HUC-TC**

Supplement: MOESM2 [file 9540190]
